# Supplementary material
Source: PubMed Central journal article supplement (PMC4834527)
Supplement: Supp_Figure1.pdf [file Supp_Figure1.pdf]

## Supplementary Data

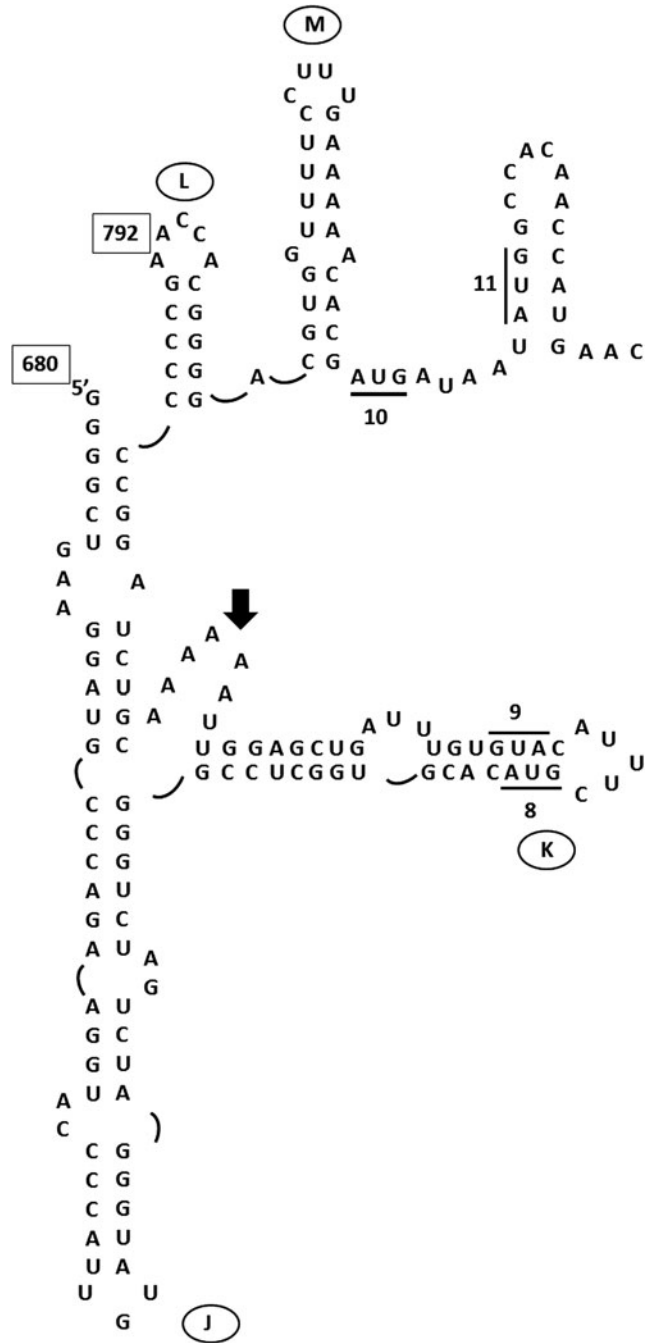

**Supplementary Figure S1.** Predicted secondary structure of the EMCV IRES (adapted from Duke et al., 1992). The sequences start from position 680. Circled capital letter J, K, L and M indicate defined region in the IRES. Arrow indicates the A bulge in the J-K domain. AUG8, AUG9, AUG10 and AUG11 are underlined.
