# Supplementary material
Source: PubMed Central journal article supplement (PMC4834527)
Supplement: Supp_Figure2.pdf [file Supp_Figure2.pdf]

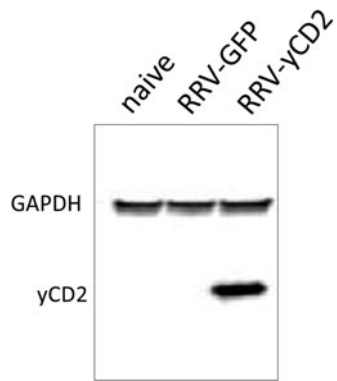

**Supplementary Figure S2** Specificity of anti-yCD2 antibody. Naïve, RRV-GFP and RRV-yCD maximally infected U87-MG cells were harvested and lysed for immunoblotting. Twenty microgram of proteins from lysates were resolved on 4–12% Bis-Tris gels. Mouse anti-human GAPDH antibody at 1: 500 dilution was used to detect the expression of GAPDH, and mouse anti-yCD2 (Tocagen, clone 9A11) antibody at 1:1,000 dilution was used to detect the expression of yCD2 protein. The specificity of the anti-yCD2 antibody is demonstrated by the lack of yCD2 signal in both naïve and RRV-GFP infected U87-MG cells.

---
