# Supplementary material
Source: PubMed Central journal article supplement (PMC4834527)
Supplement: Supp_Figure3.pdf [file Supp_Figure3.pdf]

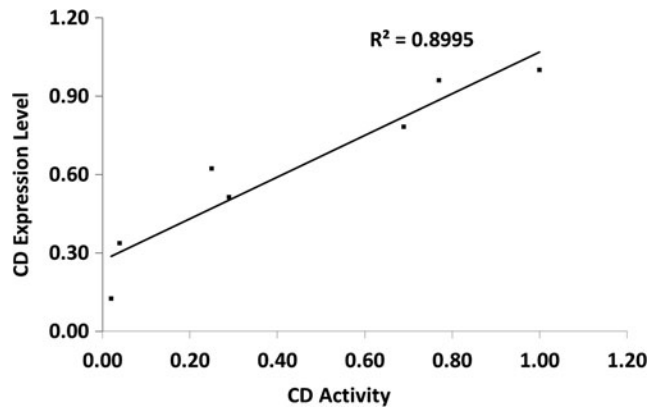

**Supplementary Figure S3.** Correlation between  $\gamma$ CD2s expression level and cell-based enzymatic activity. The  $\gamma$ CD2 expression level from maximally infected U87 cells quantified from an immunoblotting was plotted against the enzymatic activity of  $\gamma$ CD2 quantified from a cell-based assay shown in Figure 3C and 3E).

---
